# Supplementary material
Source: HighWire-hosted journal article supplement (https://bmjopenquality.bmj.com/content/7/3/e000074)
Supplement: inline-supplementary-material-1 [file inline-supplementary-material-1.docx]

**Supplemental Information:**

**Staff Safety Questionnaire Questions (1=strongly disagree, 5=strongly agree)**

| 1. My input is well received by doctors during procedures.  2. It is difficult to speak up if I perceive a problem with patient care  3. Disagreements are resolved appropriately (Not who is right, but what is best for the patient)  4. I have the support I need from others to care for patients appropriately  5. It is easy for staff to ask questions when there is something that they do not understand.  6. The doctors and support staff work together as a well-coordinated team  7. I would feel safe being treated here as a patient  8. Medical errors are handled appropriately  9. I know to whom I should direct questions regarding patient safety  10. I receive appropriate feedback about my performance  11. It is difficult to discuss errors in my team  12. I am encouraged by others to report any patient safety concerns I may have  13. The culture in the labs makes it easy to learn from others’ mistakes  14. My suggestions about safety would be acted upon if I expressed them to management.  15. I like my job    16. The cath labs are a good place to work  17. Staffing levels are sufficient to handle the number of patients  18. All necessary information for diagnostic and therapeutic decisions is routinely available.  19. Patients receive safe treatment in the cardiac catheterisation laboratory  20. We have team briefings    21. Being briefed helps me to be better prepared  22. The team brief helps me to understand the plan for the day  23. The team brief helps identify potential problems early on  24. I notice errors which delay procedures and increase the risk to patients  25. There are good levels of communication between all cardiac catheter laboratory staff  26. I would like a checklist to be used if I was undergoing a procedure in the cath labs |
| --- |

**Patient Questionnaire Questions (1=strongly disagree, 10=strongly agree)**

| Did you feel safe? |
| --- |
| Did you notice the time out? (1 = Yes) |
| If yes, did you feel safer? |
| If no, would you have liked to watch it? |
| Did you see the staff follow the checklist? |
| If yes, did you feel safer? |
| If no, does it reassure you to know we use a checklist? |
| Were you aware of any problems with your procedure? |
| Was your procedure delayed in any way? |

**Template Used for Team Briefing Process**

- Team members introduce themselves
- Brief run through the day’s cases:
  - Emphasise the most important clinical details for each patient, such as allergies/diabetes/pacemaker, etc.
  - Additionally, identify any specialist pieces of equipment that will be needed (e.g. intra-aortic balloon pump, echocardiography)
- Once all cases have been discussed, confirm the running order
- Clarify last send time for the day
- Any further points from the operator (e.g. timing of breaks)
- Questions
